# Supplementary material for: Active Acoustic Metamaterial Based on Helmholtz Resonators to Absorb Broadband Low-Frequency Noise
Source: MDPI journal article supplement (doi:10.3390/ma17040962), 2024-02-19
Supplement: s1 [file s1]

# Supplementary Materials

## S.1. More results

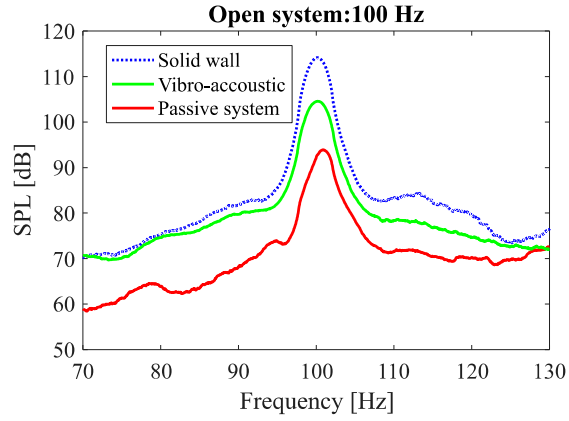

(a)

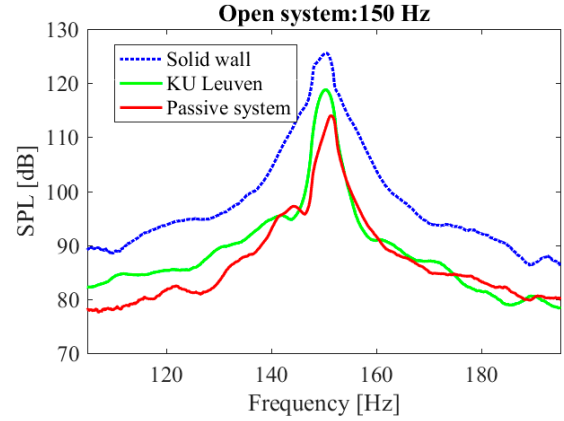

(b)

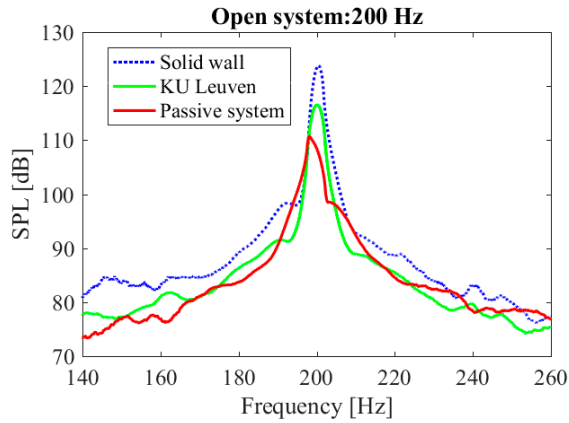

(c)

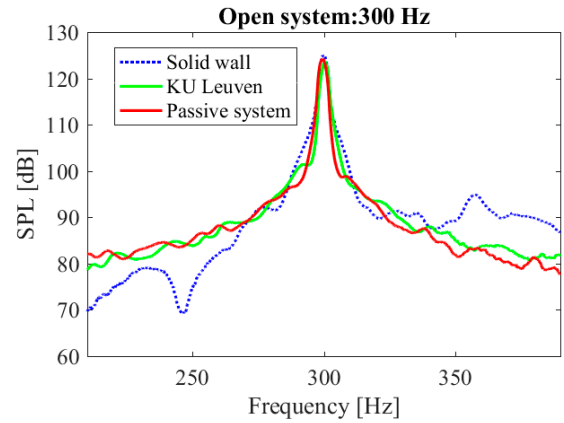

(d)

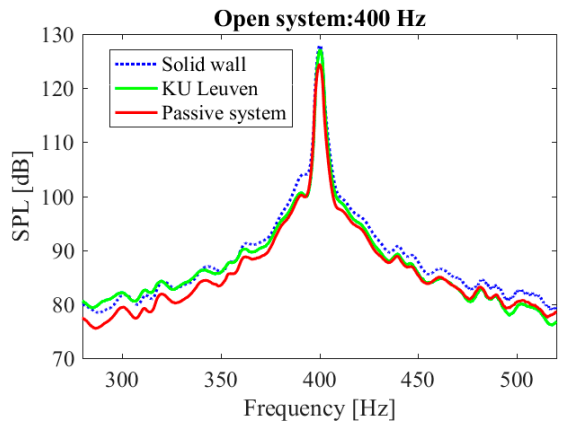

(e)

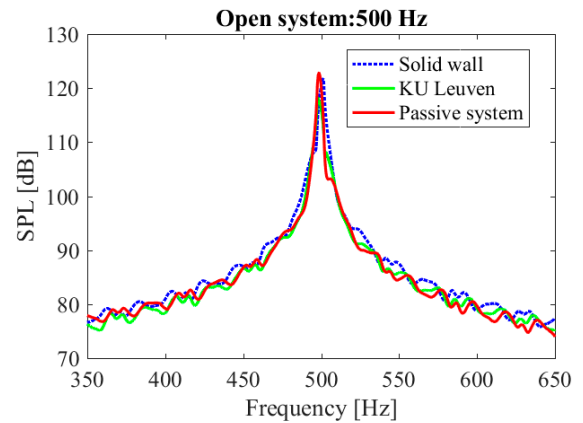

(f)

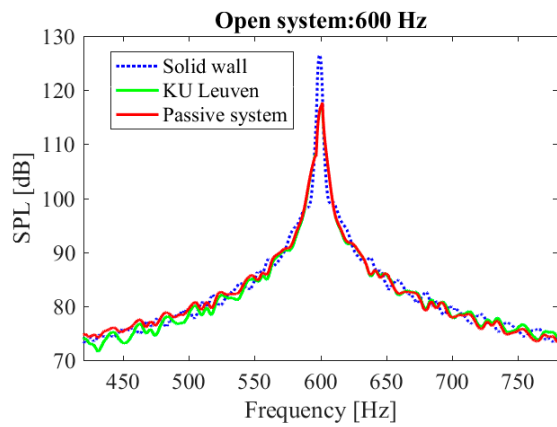

**(g)**

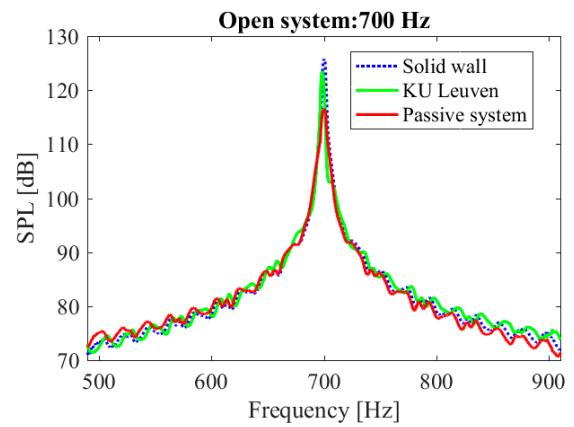

**(h)**

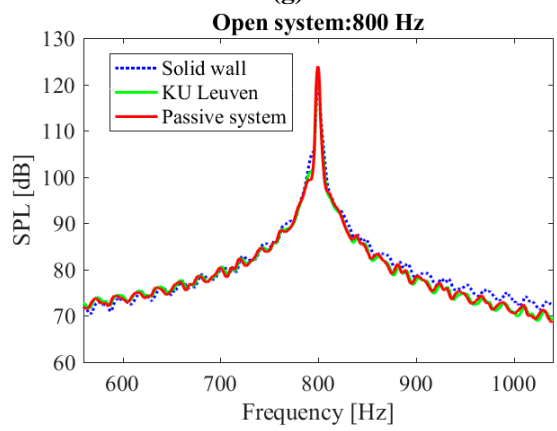

**(i)**

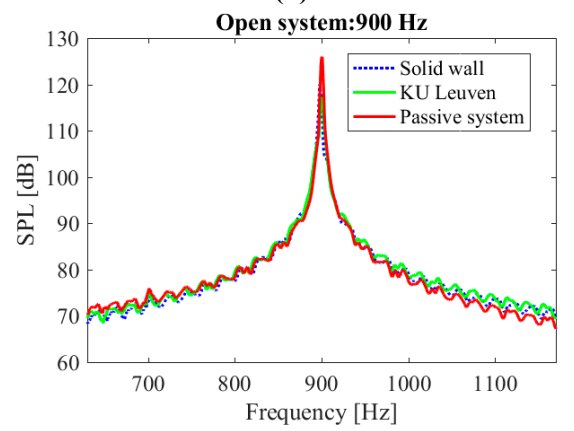

**(j)**

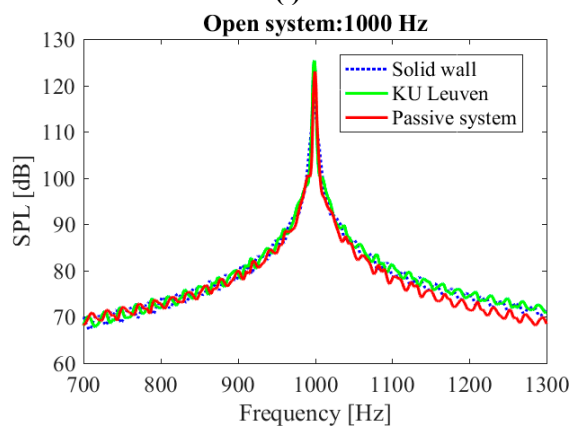

**(k)**

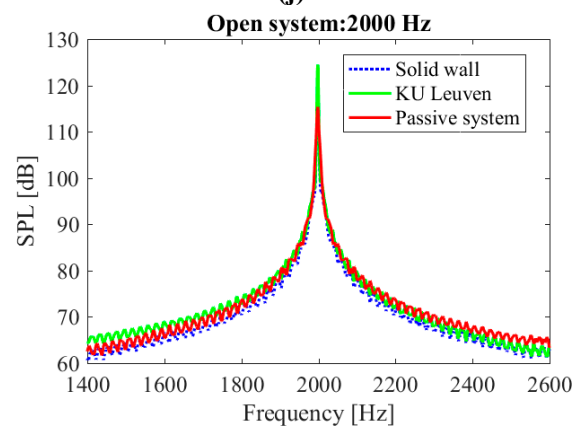

**(l)**

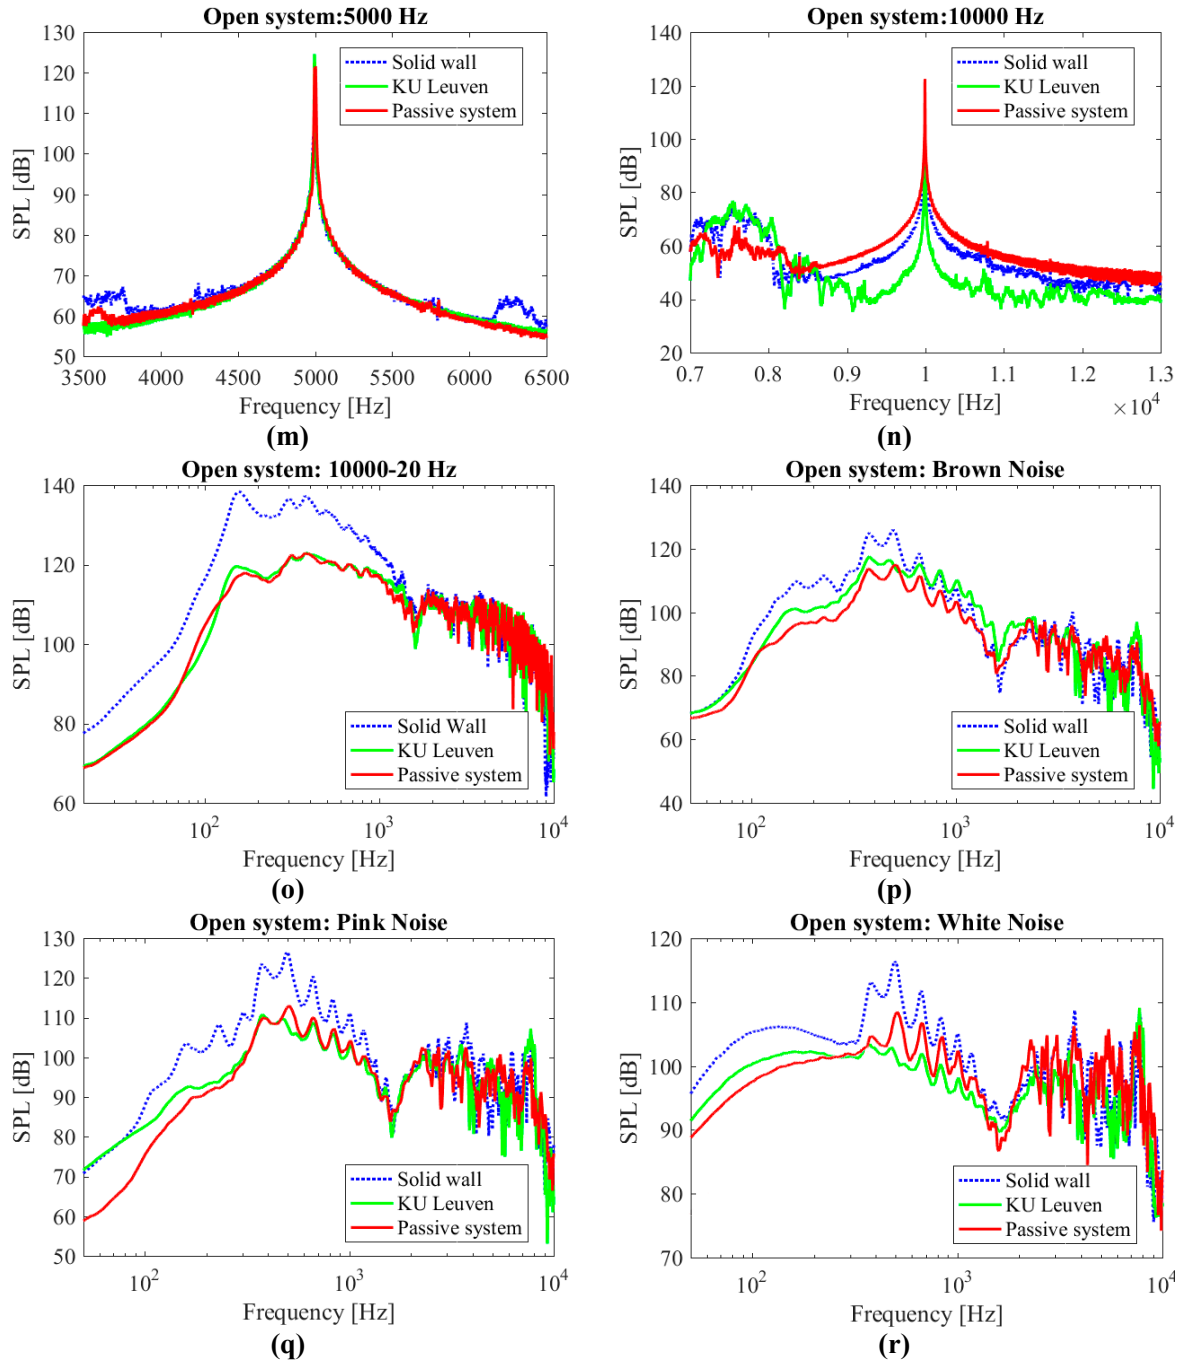

**Figure S1: Measured noise amplitude levels in the open system setup for different noise samples including pink and brown noise, isolated frequencies and frequency sweep from 10000 - 20 Hz showing the amount of attenuation achieved for each case. KU Leuven refers to vibro-acoustic metamaterial developed by Claeys et al. [1]**

## Reference

1. Claey's, C., E. Deckers, B. Pluymers, and W. Desmet, *A lightweight vibro-acoustic metamaterial demonstrator: Numerical and experimental investigation*. Mechanical Systems and Signal Processing, 2016. **70-71**: p. 853-880.
